# Supplementary material for: iPSC-Cardiomyocyte Models of Brugada Syndrome—Achievements, Challenges and Future Perspectives
Source: PubMed Central journal article supplement (PMC8001521; doi:10.3390/ijms22062825), 2021-03-10
Supplement: ijms-22-02825-s001.pdf [file ijms-22-02825-s001.pdf]

*Supplementary material*

## **iPSC-cardiomyocyte models of Brugada syndrome – achievements, challenges and future perspectives**

Aleksandra Nijak <sup>1</sup>, Johan Saenen <sup>2</sup>, Alain J. Labro <sup>3,4</sup>, Dorien Schepers <sup>1</sup>, Bart L. Loeys <sup>1,5</sup>, and Maaïke Alaerts <sup>1,\*</sup>

<sup>1</sup>Center of Medical Genetics, faculty of Medicine and Health Sciences, University of Antwerp and Antwerp University Hospital, 2650 Antwerp, Belgium

<sup>2</sup>Department of Cardiology, University of Antwerp and Antwerp University Hospital, 2610 Antwerp, Belgium 2

<sup>3</sup>Department of biomedical Sciences, University of Antwerp, 2610 Antwerp, Belgium

<sup>4</sup>Department of Basic and Applied Medical Sciences, Ghent University, 9000 Ghent, Belgium

<sup>5</sup>Department of Human Genetics, Radboud University Medical Centre, 6525 Nijmegen, The Netherlands

\*Correspondence: [maaïke.alaerts@uantwerpen.be](mailto:maaïke.alaerts@uantwerpen.be); Tel.: +32 032759780

Supplementary Table 1: Overview of the used reprogramming and differentiation approaches, together with described genetic variants, their identification methods and connected clinical phenotypes and patient history. FB- fibroblasts; Sev – Sendai virus; Retro – retroviral vector; Lenti – lentiviral vector; Episomal – episomal vectors; ML – monolayer-based; EB – EB-based; SC – suspension culture; MxS – matrix sandwich); - G – glucose starvation; LT – lactate treatment; Puro αMHC – puromycin selection of αMHC-Puro<sup>r</sup> containing spheres; M – male; F – female.

| Reference | Reprogramming |          | Differentiation |                                                    |            |                       | Genetic diagnosis |                                             |                                         | Patient information |           |                                                                                                                                                                                                                                                                                                                                  |                                                                                                                                                                                                                                                                                                                                                                                                                           |
|-----------|---------------|----------|-----------------|----------------------------------------------------|------------|-----------------------|-------------------|---------------------------------------------|-----------------------------------------|---------------------|-----------|----------------------------------------------------------------------------------------------------------------------------------------------------------------------------------------------------------------------------------------------------------------------------------------------------------------------------------|---------------------------------------------------------------------------------------------------------------------------------------------------------------------------------------------------------------------------------------------------------------------------------------------------------------------------------------------------------------------------------------------------------------------------|
|           | Cell type     | Vector   | Method          | Agents                                             | Enrichment | Culture period [days] | Gene              | Variant                                     | Method of identification                | Sex                 | Diagnosis | Clinical phenotype                                                                                                                                                                                                                                                                                                               | Family history                                                                                                                                                                                                                                                                                                                                                                                                            |
| 89        | FB            | Sev      | ML              | Activin A, BMP4, CHIR-90021, Xav939 in BPEL medium | N/A        | 28-32                 | SCN5A             | c.4912C>T (p.R1638X)                        | Diagnostic screening                    | M                   | BrS       | 34-year old; BrS type 1 ECG and ventricular tachyarrhythmias during electrophysiological investigations                                                                                                                                                                                                                          | N/A                                                                                                                                                                                                                                                                                                                                                                                                                       |
|           |               |          |                 |                                                    |            |                       |                   | c.468G>A (p.W156X)                          |                                         |                     |           | M                                                                                                                                                                                                                                                                                                                                |                                                                                                                                                                                                                                                                                                                                                                                                                           |
| 68        | FB            | Sev      | ML              | CHIR99021, IWR-1                                   | -G         | 40-60                 | SCN5A             | c.2053G>A (p.R620H) and c.2626G>A (p.R811H) | Diagnostic screening                    | M                   | BrS       | 44 year old; unstable ventricular tachycardia after multiple episodes of recurrent syncope. BrS diagnosis based on BrS type-1 ECG pattern at rest                                                                                                                                                                                | Sudden death in two paternal uncles and a female cousin                                                                                                                                                                                                                                                                                                                                                                   |
|           |               |          |                 |                                                    |            |                       |                   | c.4189delT/4190ΔA/1397Δ(frameshift)         |                                         |                     |           | M                                                                                                                                                                                                                                                                                                                                | BrS                                                                                                                                                                                                                                                                                                                                                                                                                       |
| 90        | FB            | Retro    | ML              | CHIR99021, IWR-1                                   | LT         | 35-45                 | SCN5A             | c.677C>T (p.A226V) and c.4885C>T (p.R1629X) | Genetic screening of SCN5A gene         | M                   | BrS       | 21-year old, presented with syncopal events since the age of 11 during exercise. Baseline ECG with BrS type-2 pattern and first-degree atrioventricular block and QRS duration of 130 ms. Treadmill testing ECG showed a QRS widening up to 240 ms and a BrS type-1 ECG pattern followed by polymorphic ventricular tachycardia. | Father - p.A226V with ajmaline induced type-1 ECG pattern. Mother - p.R1629X carrier asymptomatic, with baseline ECG showing first-degree AV block at 250 ms, with prolonged QRS duration of 130 ms and a saddle shaped ST elevation in V2 lead. Treadmill challenge revealed QRS prolongation up to 160 ms with no BrS characteristics. Healthy SCN5A variants negative brother and asymptomatic p.A226V carrier sister. |
| 91        | FB            | Episomal | EB              | END-2 conditioned media                            | N/A        | 22-31                 | SCN5A             | c.1100G>A (p.R367H)                         | Familial Arrhythmia Network of Scotland | M                   | BrS       | 69-year old; classical ST-segment elevation in the ECG                                                                                                                                                                                                                                                                           | N/A                                                                                                                                                                                                                                                                                                                                                                                                                       |
|           |               |          | ML              | CHIR99021, heparin, IWP2                           |            |                       |                   |                                             |                                         |                     |           |                                                                                                                                                                                                                                                                                                                                  |                                                                                                                                                                                                                                                                                                                                                                                                                           |

|    |    |                          |             |                                               |           |       |        |                                                           |                                             |     |           |                                                                                                                                                                                                                                                                                   |                                                                                                                                                                                                                                                                                                                    |
|----|----|--------------------------|-------------|-----------------------------------------------|-----------|-------|--------|-----------------------------------------------------------|---------------------------------------------|-----|-----------|-----------------------------------------------------------------------------------------------------------------------------------------------------------------------------------------------------------------------------------------------------------------------------------|--------------------------------------------------------------------------------------------------------------------------------------------------------------------------------------------------------------------------------------------------------------------------------------------------------------------|
| 56 | FB | Retro                    | SC<br>ML    | CHIR99021,<br>IWP2                            | N/A       | 20-46 | SCN5A  | c.2204C>T<br>(p.A735V)                                    | N/A                                         | N/A | BrS       | BrS diagnosis in cases from four different clinical centres                                                                                                                                                                                                                       | One familial case with multiple mutation carriers with variable phenotypes                                                                                                                                                                                                                                         |
| 88 | FB | Lenti                    | EB          | END-2 cells co-culture                        | N/A       | 50    | SCN5A  | c.5537insTG<br>A<br>(p.1795insD)                          | Mutation analysis of SCN5A                  | M   | LQTS3/BrS | Bradycardia, ventricular and atrial conduction slowing, including diagnosed cases of BrS and LQTS                                                                                                                                                                                 | Dutch founder mutation, identified in a large family with multiple individuals presenting variable symptoms                                                                                                                                                                                                        |
| 86 | FB | Retro                    | EB          | Wnt3a                                         | N/A       | 30    | SCN5A  | c.5349G>A<br>(p.E1784K)                                   | Genetic screening of SCN5A gene             | M   | LQTS3/BrS | 20-year old; sudden cardiac arrest while driving a car, successfully resuscitated by external defibrillator, which indicated ventricular fibrillation, while surface ECG showed QT interval prolongation. Pilsicainide administration unmasked coved-shaped ST segment elevation. | No family history of previous syncope or significant QT interval abnormalities                                                                                                                                                                                                                                     |
| 69 | FB | Lenti<br>Episomal<br>SeV | ML          | CHIR99021,<br>IWP2                            | LT        | 40-60 | SCN10A | c.3749G>A<br>(p.R1250Q)<br>and<br>c.3808G>A<br>(p.R1268Q) | Genetic screening of 8 BrS-associated genes | M   | BrS       | SCD during ajmaline challenge, no structural abnormalities of the heart                                                                                                                                                                                                           | No history of SCD                                                                                                                                                                                                                                                                                                  |
| 70 | FB | Lenti<br>Episomal<br>SeV | ML          | CHIR99021, IWP2                               | LT        | 40-60 | SCN1B  | c.629T>C<br>(p.L210P)<br>and<br>c.637C>A<br>(p.P213T)     | Genetic screening of 8 BrS candidate genes  | M   | BrS       | Syncope at rest with BrS type 1 ECG in ajmaline challenge                                                                                                                                                                                                                         | No history of SCD; mutations carrier son with asymptomatic BrS                                                                                                                                                                                                                                                     |
| 71 | FB | SeV                      | ML<br>(MxS) | Activin A, BMP4, bFGF, DKK1, VERGF, SB-431542 | N/A       | 31-35 | RRAD   | p.Arg211His                                               | WES                                         | M   | BrS       | Systematic ECG with typical but labile BrS type 1 ECG pattern with a history of palpitations associated with a near syncope and nocturnal agonal respiration. Treated with an ICD implantation                                                                                    | Identification of 4 affected relatives after flecainide challenge and one with BrS type 1 ECG pattern. No relevant symptoms observed in all of those individuals. History of unexplained SCD in probands' 41-year old uncle. RRAD variant present in all affected individuals (4) and 2 unaffected family members. |
| 92 | FB | Lenti                    | EB          | Activin A, BMP4, bFGF, DKK1, VERGF, SB-431542 | Puro αMHC | 60    | PKP2   | R635Q<br>(c.1904G>A)                                      | Retrospective WES                           | M   | BrS       | 31-year old; two episodes of syncope at rest with spontaneous BrS type-1 ECG. Implanted ICD with no shocks at follow up                                                                                                                                                           | Symptomatic grandfather with sudden death during sleep. Affected mutation-positive father with a history of syncope at rest. Mutation carrier brother with a positive flecainide test                                                                                                                              |

|    |    |                  |    |                      |    |       |           |                       |                                                                             |   |     |                                                                                                                                                                                                                                                                                   |                                                                                                       |
|----|----|------------------|----|----------------------|----|-------|-----------|-----------------------|-----------------------------------------------------------------------------|---|-----|-----------------------------------------------------------------------------------------------------------------------------------------------------------------------------------------------------------------------------------------------------------------------------------|-------------------------------------------------------------------------------------------------------|
| 87 | FB | Lenti<br>STEMCCA | EB | KY02111, XAV939      | LT | 42-56 | Undefined |                       | NGS<br>sequencing<br>of 12 BrS<br>and 26<br>arrhythmia-<br>related<br>genes | M | BrS | 28-years old; VF arrest at 16-years old,<br>spontaneous BrS-type 1 ECG                                                                                                                                                                                                            | Father presenting similar ECG                                                                         |
|    |    |                  |    |                      |    |       | Undefined |                       |                                                                             | M | BrS | 30-years old; ajmaline induced BrS-type<br>1 ECG, occasional spontaneous                                                                                                                                                                                                          | N/A                                                                                                   |
|    |    |                  |    |                      |    |       | PKP2      | c.302G>A<br>(p.R101H) |                                                                             | M | BrS | 68-years old; ajmaline induced BrS-type<br>1 ECG leading to VF; occasional<br>spontaneous                                                                                                                                                                                         | N/A                                                                                                   |
| 55 | FB | Lenti<br>STEMCCA | ML | CHIR99021, IWP-<br>4 | LT | 19    | Undefined |                       | Genetic<br>screening<br>of BrS-<br>associated<br>genes                      | M | BrS | 42-year old; spontaneous BrS type 1 ECG,<br>previous story of syncope, no structural<br>cardiac abnormalities                                                                                                                                                                     | 3 relatives with ajmaline induced BrS<br>ECGs with no history of SCD                                  |
|    |    |                  |    |                      |    |       | Undefined |                       |                                                                             | M | BrS | 67-year old; spontaneous BrS type 1 ECG,<br>previous story of syncope. Diagnosed<br>with BrS during hospital admission for<br>an inferior myocardial infarction                                                                                                                   | 6 relatives with ajmaline induced BrS<br>ECGs, several family members with<br>previous history of SCD |
|    |    |                  |    |                      |    |       | CACNA1C   | int19<br>position -7  |                                                                             | F | BrS | 24-year old; spontaneous BrS type 1 ECG,<br>previous history of syncope, no structural<br>cardiac abnormalities. Inducible non-<br>sustained ventricular tachycardias in<br>RVOT followed by ICD implantation. PR-<br>interval prolongation (220 ms) with<br>normal QRS- and QTc. | 5 relatives with ajmaline induced BrS<br>ECGs with no history of SCD                                  |

Supplementary Table 2: AP properties published from BrS iPSC-CM models. RMP/MDP – resting membrane potential/maximum diastolic potential; APA – action potential amplitude; APD20/APD50/APD90 – action potential duration at 20/50/90 % of depolarization;  $V_{max}$ - upstroke velocity; RT -room temperature.

| Reference | Cell line                                   | AP properties   |            |                |            |              |            |              |                 |                            |            | Protocol                                                                                                       | In silico $I_{K1}$ injection                         |                                                                                                                                                     |
|-----------|---------------------------------------------|-----------------|------------|----------------|------------|--------------|------------|--------------|-----------------|----------------------------|------------|----------------------------------------------------------------------------------------------------------------|------------------------------------------------------|-----------------------------------------------------------------------------------------------------------------------------------------------------|
|           |                                             | RMP/MDP [mV]    | APA [mV]   | Overshoot [mV] | APD20 [ms] | APD30 [ms]   | APD50 [ms] | APD90 [ms]   | $V_{max}$ [v/s] | peak to peak duration [ms] | n          |                                                                                                                |                                                      |                                                                                                                                                     |
| 89        | hiPSC-CM <sup>WT1</sup>                     | -75±1           | 105±5      |                |            |              | 125±20     | 190±20       | 56±12           |                            | 12         | Isolated cells recorded on D28-32 of differentiation. APs measured at 37°, elicited at frequency of 1Hz by 3ms |                                                      |                                                                                                                                                     |
|           | hiPSC-CM <sup>WT2</sup>                     | -75±0.5         | 107±3      |                |            |              | 205±10     | 290±15       | 55±3            |                            | 12         |                                                                                                                |                                                      |                                                                                                                                                     |
|           | hiPSC-CM <sup>R1638X</sup>                  | -70±0.5         | 100±2      |                |            |              | 160±10     | 205±15       | 18±2            |                            | 14         |                                                                                                                |                                                      |                                                                                                                                                     |
|           | hiPSC-CM <sup>W156X</sup>                   | -70±0.5         | 98±5       |                |            |              | 150±20     | 200±20       | 19±2            |                            | 16         |                                                                                                                |                                                      |                                                                                                                                                     |
| 68        | CON1                                        | -58.9±0.8       | 106.4±1.0  | 48.0±0.7       |            |              |            | 443.5±17.3   | 15.6±0.8        | 49.4±5.5                   | 10to25     | APs recorded on dissociated cells at day 40-60 at 36-37 degrees                                                |                                                      |                                                                                                                                                     |
|           | CON2                                        |                 |            |                |            |              |            |              |                 |                            |            |                                                                                                                |                                                      |                                                                                                                                                     |
|           | BrS1                                        | -58.1±0.7       | 107.1±1.6  | 50.1±1.2       |            |              |            | 459.3±38.2   | 11.1±0.1        | 380.4±96.2                 | 10to25     |                                                                                                                |                                                      |                                                                                                                                                     |
|           | BrS2                                        | -56.5±2.0       | 105.0±2.6  | 47.8±2.5       |            |              |            | 396.2±33.4   | 7.2±1.1         | 195.5±60.3                 | 10to25     |                                                                                                                |                                                      |                                                                                                                                                     |
|           | BrSp2-GE                                    | -64.2±1.0       | 109.3±1.5  | 46.1±0.9       |            |              |            | 355.8±19.3   | 17.4±1.2        | 48.4±7.4                   | 10to25     |                                                                                                                |                                                      |                                                                                                                                                     |
| 90        | CON1                                        | -<br>43.39±2.81 | 87.5±5.76  |                |            | 204.09±44.01 |            | 362.09±56.35 | 473.64±63.97    | 17.76±4.59                 | 37.83±5.81 | 11                                                                                                             | APs recorded at day 35-45 of differentiation at 34°C | Generated in real time in response to CM membrane potential; potentiometer was set to provide a standard outward current peaked at 150 pA at -75 mV |
|           | BrS_A266V+R1629X                            | -<br>49.09±6.12 | 91.16±8.09 |                |            | 277.46±48.5  |            | 430.82±60.84 | 493.18±62       | 15.76±4.59                 | 32.57±7.92 | 11                                                                                                             |                                                      |                                                                                                                                                     |
|           | BrS_A266V+R1629X<br>1.0 Hz                  | -<br>57.83±0.32 | 73.30±1.53 |                |            | 92.08±5.18   |            | 166.10±4.77  | 221.24±8.58     | 10.72±0.32                 |            | 3                                                                                                              |                                                      |                                                                                                                                                     |
|           | BrS_A266V+R1629X<br>1.5 Hz                  | -<br>57.87±1.54 | 74.12±0.93 |                |            | 88.61±1.82   |            | 153.60±5.87  | 209.77±9.63     | 9.21±0.09                  |            | 3                                                                                                              |                                                      |                                                                                                                                                     |
|           | BrS_A266V+R1629X<br>0.5 Hz                  | -<br>60.72±2.02 | 69.00±1.55 |                |            | 95.00±4.82   |            | 164.66±9.2   | 216.36±12.1     | 14.05±1.87                 |            | 3                                                                                                              |                                                      |                                                                                                                                                     |
|           | BrS_A266V+R1629X<br>0.2 Hz                  | -<br>53.52±3.17 | 64.10±5.35 |                |            | 87.37±7.43   |            | 166.30±6.97  | 221.25±10.31    | 13.21±0.02                 |            | 3                                                                                                              |                                                      |                                                                                                                                                     |
|           | CON1 with $I_{K1}$<br>injection             | -84.2±04        | 128.6±1.3  | 44.4±1.0       | 126.3±14.2 |              | 297.2±25   | 339.2±26.8   | 185.1±11        |                            | 22         |                                                                                                                |                                                      |                                                                                                                                                     |
|           | BrS_A266V+R1629X<br>with $I_{K1}$ injection | -84.4±0.2       | 115.6±0.9  | 31.3±0.9       | 223.8±12.3 |              | 318.2±13.9 | 338±14.3     | 41.9±5.3        |                            | 45         |                                                                                                                |                                                      |                                                                                                                                                     |

|                                                                     |           |           |          |            |  |            |            |            |  |    |  |  |
|---------------------------------------------------------------------|-----------|-----------|----------|------------|--|------------|------------|------------|--|----|--|--|
| CON1 with I <sub>k1</sub> injection 1 Hz                            | -84.2±0.2 | 128.0±1.4 | 43.8±1.1 | 142.6±18.8 |  | 302.9±32.8 | 348.2±31.7 | 178.9±12.3 |  | 19 |  |  |
| CON1 with I <sub>k1</sub> injection 0.5 Hz                          | -84.3±0.2 | 129.9±1.3 | 45.5±1.0 | 186.0±32.6 |  | 381.7±53.0 | 426.3±52.6 | 193.8±13.0 |  | 19 |  |  |
| CON1 with I <sub>k1</sub> injection 0.2 Hz                          | -84.4±0.2 | 129.9±1.3 | 45.5±1.1 | 133.6±46.5 |  | 328.4±65.2 | 367.2±65.1 | 197.3±13.9 |  | 19 |  |  |
| BrS_A266V+R1629X with I <sub>k1</sub> injection non-ER 1 Hz         | -84.2±0.4 | 115.3±0.9 | 31.10.9  | 211.7±13.4 |  | 310.9±16.1 | 331.5±16.6 | 36.9±5.7   |  | 33 |  |  |
| BrS_A266V+R1629X with I <sub>k1</sub> injection non-ER 0.5 Hz       | -84.5±0.4 | 117.0±1.0 | 32.7±1.0 | 308.6±22.8 |  | 424.3±26.8 | 444.2±27.3 | 40.7±6.4   |  | 33 |  |  |
| BrS_A266V+R1629X with I <sub>k1</sub> injection non-ER 0.1 Hz       | -84.4±0.4 | 114.1±1.2 | 29.7±1.2 | 284.2±29.8 |  | 396.0±35.2 | 414.6±35.8 | 42.1±6.8   |  | 33 |  |  |
| BrS_A266V+R1629X with I <sub>k1</sub> injection ER 1 Hz             | -85.0±0.3 | 116.1±2.7 | 31.1±2.6 | 173.8±20.4 |  | 249.9±17.7 | 267.4±17.9 | 36.4±6.9   |  | 11 |  |  |
| BrS_A266V+R1629X with I <sub>k1</sub> injection ER 0.5 Hz           | -84.5±0.4 | 112.8±2.9 | 28.3±2.8 | 148.3±37.0 |  | 214.9±39.7 | 231.8±40.2 | 36.5±7.4   |  | 11 |  |  |
| BrS_A266V+R1629X with I <sub>k1</sub> injection ER 0.11 Hz          | -81.6±0.9 | 103.5±4.1 | 21.9±3.6 | 31.8±8.7   |  | 65.7±10.4  | 87.6±11.4  | 35.3±7.0   |  | 11 |  |  |
| CON2 with I <sub>k1</sub> injection patched at 24°C 1 Hz            |           |           | 40±2     |            |  |            | 510±100    | 110±30     |  | 9  |  |  |
| CON2 with I <sub>k1</sub> injection patched at 24°C 0.1 Hz          |           |           | 42±2     |            |  |            | 600±190    | 130±30     |  | 9  |  |  |
| BrS2 p.T1620M with I <sub>k1</sub> injection patched at 24°C 1 Hz   |           |           | 43±1     |            |  |            | 370±10     | 190±20     |  | 11 |  |  |
| BrS2 p.T1620M with I <sub>k1</sub> injection patched at 24°C 0.1 Hz |           |           | 44±1     |            |  |            | 390±20     | 205±20     |  | 11 |  |  |
| BrS2 p.T1620M with I <sub>k1</sub> injection patched at 34°C 1 Hz   |           |           | 55±4     |            |  |            | 505±20     | 380±10     |  | 6  |  |  |
| BrS2 p.T1620M with I <sub>k1</sub> injection patched at 34°C 0.1 Hz |           |           | 56±5     |            |  |            | 610±90     | 395±5      |  | 6  |  |  |

|    |                                                                     |           |           |          |             |  |            |            |            |  |    |                                                                                                                                                                                                                                                                       |              |
|----|---------------------------------------------------------------------|-----------|-----------|----------|-------------|--|------------|------------|------------|--|----|-----------------------------------------------------------------------------------------------------------------------------------------------------------------------------------------------------------------------------------------------------------------------|--------------|
|    | BrS_A266V+R1629X with I <sub>K1</sub> injection 0.1 Hz              | -82.9±0.9 | 107.6±4.6 | 24.7±4.0 | 53.1±21.3   |  | 116.2±31.5 | 127.5±29.7 | 60.7±12.4  |  | 9  |                                                                                                                                                                                                                                                                       |              |
|    | BrS_A266V+R1629X with I <sub>K1</sub> injection 0.1 Hz +0.5 mM 4-AP | -83.6±0.6 | 114.7±1.4 | 31.1±1.2 | 405.9±28.18 |  | 551.5±23.1 | 579.2±23.7 | 52.0±10.0  |  | 9  |                                                                                                                                                                                                                                                                       |              |
|    | BrS_A266V+R1629X with I <sub>K1</sub> injection 1 Hz                | -84.8±0.4 | 115.6±2.2 | 30.8±1.9 | 199.9±18.7  |  | 288.9±19.4 | 308.5±19.7 | 31.4±7.7   |  | 9  |                                                                                                                                                                                                                                                                       |              |
|    | BrS_A266V+R1629X with I <sub>K1</sub> injection 1 Hz +Flecainide    | -85.0±0.3 | 109.6±2.1 | 24.6±1.8 | 104.0±10.5  |  | 157.4±12.3 | 170.9±12.4 | 12.6±2.7   |  | 9  |                                                                                                                                                                                                                                                                       |              |
| 56 | WT (average from both controls)                                     | -70±3     | 108±4     |          |             |  | 1802±494   |            | 23±7       |  | 16 | Dissociated cells at 37 degrees patched 20-46 days after the start of differentiation                                                                                                                                                                                 | 0 to -100 pA |
|    | WT with I <sub>K1</sub> injection (average from both controls)      | -82±1     | 135±4     |          |             |  | 1250±280   |            | 121±13     |  | 21 |                                                                                                                                                                                                                                                                       |              |
|    | WT1                                                                 |           |           |          |             |  |            |            | 140±12     |  | 12 |                                                                                                                                                                                                                                                                       |              |
|    | WT2                                                                 |           |           |          |             |  |            |            | 98±10      |  | 9  |                                                                                                                                                                                                                                                                       |              |
|    | MUT1                                                                |           |           |          |             |  |            |            | 22±4       |  | 32 |                                                                                                                                                                                                                                                                       |              |
|    | MUT2                                                                |           |           |          |             |  |            |            | 41±9       |  | 29 |                                                                                                                                                                                                                                                                       |              |
|    | MUT (average from both mutants)                                     | -65±2     | 104±2     |          |             |  | 2274±314   |            | 7±1        |  | 41 |                                                                                                                                                                                                                                                                       |              |
| 88 | hiPSC-CM control                                                    | -72.4±0.9 | 106±3.2   |          | 50.7±6.2    |  | 89.8±7.9   | 173.5±12.2 | 115.7±18.4 |  | 16 | Single CMs, after day 50 of differentiation; data from 4 independent differentiations per line. Recordings on quiescent cells that contracted upon field stimulation; recordings performed at 36°C; APs elicited at 1,2 or 3 Hz by 3ms, 1.2x threshold current pulses |              |
|    | hiPSC-CM het                                                        | -71.3±1.3 | 103.1±3.2 |          | 58.7±5.9    |  | 109±10.1   | 217.2±14.9 | 57.6±14    |  | 13 |                                                                                                                                                                                                                                                                       |              |

|                            |                            |           |          |          |  |         |            |            |           |           |    |                                                                                   |     |
|----------------------------|----------------------------|-----------|----------|----------|--|---------|------------|------------|-----------|-----------|----|-----------------------------------------------------------------------------------|-----|
|                            |                            |           |          |          |  |         |            |            |           |           |    | through the patch pipette; average from 10 consecutive AP waveforms               |     |
| 86                         | Control                    | -65±4     | 99.3±3.9 | 34.4±2.5 |  |         | 247.3±30.5 | 416.7±24   | 15.8±3.8  |           | 10 | iPSC-CMs after day 30                                                             |     |
|                            | LQTS/BrS                   | -60±2.8   | 97.4±4   | 37.4±1.8 |  |         | 326.1±74.5 | 563.7±57.1 | 21.8±10.8 |           | 7  |                                                                                   |     |
|                            | corrected                  | -53.8±1.9 | 93.1±2.9 | 39.3±1.2 |  |         | 250.9±40   | 418±29.6   | 8.6±1.6   |           | 10 |                                                                                   |     |
| 69                         | Control D1                 | -82±1     | 138±4    |          |  |         | 102±13     | 290±5      | 42±3      |           | 22 | Dissociated cells at D40-60 of differentiation, Patching at RT                    | Yes |
|                            | Control D2                 | -82±1     | 140±2    |          |  |         | 142±18     | 295±5      | 39±2      |           | 21 |                                                                                   |     |
|                            | Control D3                 | -82±1     | 130±2    |          |  |         | 98±13      | 230±5      | 38±3      |           | 22 |                                                                                   |     |
|                            | BrS SCN10A                 | -81±1     | 125±2    |          |  |         | 115±15     | 285±5      | 23±2      |           | 19 |                                                                                   |     |
|                            | Control D1 +3 µM ajmaline  | -81±1     | 140±2    |          |  |         | 90±12      | 220±5      | 43±3      |           | 11 |                                                                                   |     |
|                            | Control D1 +10 µM ajmaline | -81±1     | 138±2    |          |  |         | 80±12      | 219±5      | 41±3      |           | 11 |                                                                                   |     |
|                            | Control D1 +30 µM ajmaline | -81±1     | 135±2    |          |  |         | 79±12      | 219±5      | 36±3      |           | 11 |                                                                                   |     |
|                            | BrS SCN10A +3 µM ajmaline  | -80±1     | 120±2    |          |  |         | 116±15     | 253±7      | 25±2      |           | 15 |                                                                                   |     |
|                            | BrS SCN10A +10 µM ajmaline | -81±1     | 110±2    |          |  |         | 125±15     | 280±7      | 21±2      |           | 15 |                                                                                   |     |
| BrS SCN10A +30 µM ajmaline | -81±1                      | 108±2     |          |          |  | 140±15  | 305±7      | 20±1       |           | 15        |    |                                                                                   |     |
| 70                         | Control D1                 | -82±1     | 138±4    |          |  |         | 102±13     | 290±5      | 42±3      |           | 22 | Dissociated cells at D40-60 of differentiation, Patching at RT                    | Yes |
|                            | Control D2                 | -82±1     | 140±2    |          |  |         | 142±18     | 295±5      | 39±2      |           | 19 |                                                                                   |     |
|                            | Control D3                 | -82±1     | 130±2    |          |  |         | 100±13     | 285±5      | 38±3      |           | 30 |                                                                                   |     |
|                            | BrS                        | -82±1     | 103±2    |          |  |         | 150±20     | 320±10     | 28±3      |           | 17 |                                                                                   |     |
| 71                         | Ctl1                       |           |          |          |  | 150±5   | 200±10     | 210±90     | 14±7      | 500±100   | 6  | Patched on D31-35 with amphotericin-B on single cells at 37°C; cycle length 700ms |     |
|                            | BrS1                       |           |          |          |  | 210±100 | 290±120    | 400±200    | 9±7       | 1100±1900 | 16 |                                                                                   |     |
|                            | Rad WT                     |           |          |          |  | 250±60  | 390±200    | 400±300    | 16±29     | 600±600   | 7  |                                                                                   |     |
|                            | Rad R211H ins              |           |          |          |  | 500±110 | 580±120    | 590±110    | 10±3      | 1100±800  | 7  |                                                                                   |     |
| 87                         | iPS-HS1M                   | -58±46    | 90±35    |          |  |         |            | 183.0±17.9 | 17±10     |           | 21 | APs recorded at D42-56 of differentiation at 22±2°C                               |     |
|                            | iBR1-P5M-L1                | -50±10    | 88±37    |          |  |         |            | 125.5±12.4 | 17±10     |           | 17 |                                                                                   |     |
| 55                         | iCtrl 1                    | -80       | 115±2    |          |  | 65±6    |            | 120±8      | 155±8     | 225±13    |    | 30                                                                                |     |



|  |         |     |       |  |       |  |       |        |        |  |    |                                                                                                                                  |                 |
|--|---------|-----|-------|--|-------|--|-------|--------|--------|--|----|----------------------------------------------------------------------------------------------------------------------------------|-----------------|
|  | iCtrl 2 | -80 | 110±2 |  | 85±5  |  | 155±8 | 190±8  | 200±13 |  | 30 | iPSC-CMs after day 19 at 36°C; APs elicited at 0.5-3 Hz by 3-ms, ~1.2x threshold current pulses; average from 10 consecutive APs | Constant 2pA/pF |
|  | iBrS 1  | -80 | 118±2 |  | 86±5  |  | 150±8 | 175±8  | 180±20 |  | 28 |                                                                                                                                  |                 |
|  | iBrS 2  | -80 | 115±2 |  | 55±4  |  | 100±5 | 130±5  | 195±13 |  | 30 |                                                                                                                                  |                 |
|  | iBrS 3  | -78 | 118±4 |  | 80±5  |  | 149±8 | 177±8  | 260±15 |  | 19 |                                                                                                                                  |                 |
|  | iSCN5A  | -78 | 126±2 |  | 110±5 |  | 180±5 | 240±20 | 126±25 |  | 22 |                                                                                                                                  |                 |

Supplementary Table 3:  $I_{Na}$  properties from published BrS iPSC-CM models.  $\kappa$  – slope factor of activation/inactivation curve;  $V_{1/2}$ - mid-point of activation/inactivation;  $\tau_f$ - fast kinetics;  $\tau_s$ - slow kinetics;  $I_{NaL}$ - late/persistent sodium current density; RT – room temperature

| Reference | Cell line                       | Sodium current properties |       |            |                |    |              |                |               |               |    |               |               |    |           |   |                  |       | Protocol                                                                 |
|-----------|---------------------------------|---------------------------|-------|------------|----------------|----|--------------|----------------|---------------|---------------|----|---------------|---------------|----|-----------|---|------------------|-------|--------------------------------------------------------------------------|
|           |                                 | $I_{Na}$ peak density     |       | Activation |                |    | Inactivation |                |               |               |    | Recovery      |               |    | $I_{NaL}$ |   | Cell capacitance |       |                                                                          |
|           |                                 | pA/pF                     | n     | $\kappa$   | $V_{1/2}$ [mV] | n  | $\kappa$     | $V_{1/2}$ [mV] | $\tau_f$ [ms] | $\tau_s$ [ms] | n  | $\tau_f$ [ms] | $\tau_s$ [ms] | n  | pA/pF     | n | pF               | n     |                                                                          |
| 89        | hiPSC-CM <sup>WT1</sup>         | -105±15                   | 11    |            |                |    |              |                |               |               |    |               |               |    |           |   |                  |       | Recordings at RT; cycle length 5s, -5mV hyperpolarizing step from -50 mV |
|           | hiPSC-CM <sup>WT2</sup>         | -102±13                   | 21    |            |                |    |              |                |               |               |    |               |               |    |           |   |                  |       |                                                                          |
|           | hiPSC-CM <sup>R1638X</sup>      | -30±2                     | 11    |            |                |    |              |                |               |               |    |               |               |    |           |   |                  |       |                                                                          |
|           | hiPSC-CM <sup>W156X</sup>       | -32±3                     | 10    |            |                |    |              |                |               |               |    |               |               |    |           |   |                  |       |                                                                          |
| 68        | CON1                            | -122.8±                   | 10-   |            |                |    |              |                |               |               |    |               |               |    |           |   | 22.2±            | 10-   | INa recordings at RT; cycle length 40ms; holding potential -80 mV        |
|           | CON2                            | 31.3                      | 25    |            |                |    |              |                |               |               |    |               |               |    |           |   | 4                | 25    |                                                                          |
|           | BrS1                            | -33.7±6.3                 | 10-25 |            |                |    |              |                |               |               |    |               |               |    |           |   | 27±1.7           | 10-25 |                                                                          |
|           | BrS2                            | -36.8±8.6                 | 10-25 |            |                |    |              |                |               |               |    |               |               |    |           |   | 24.9±2.2         | 10-25 |                                                                          |
|           | BrSp2-GE                        | -63.0±4.3                 | 10-25 |            |                |    |              |                |               |               |    |               |               |    |           |   | 21.9±2.6         | 10-25 |                                                                          |
| 90        | CON1                            | -245.8±32.7               | 15    | 4.94±0.4   | 35.72±0.46     | 15 | 7.55±0.35    | 70.26±0.4      |               |               | 15 | 19.1±0.05     | 327.4±0.05    | 14 |           |   |                  |       | Patched at RT; cycle length 5s; holding potential -90 mV                 |
|           | BrS_A266V+R1629X                | -59.2±8.8                 | 21    | 4.99±0.49  | 40.89±0.56     | 21 | 6.38±0.19    | 73.37±0.22     |               |               | 15 | 23.3±0.04     | 380±0.05      | 14 |           |   |                  |       |                                                                          |
| 91        | Beating bodies Control hiPSC-CM | -78.77±5.16               | 3     | 5.57±0.33  | 44.15±0.37     | 3  | 8.94±1.54    | 61.64±0.77     |               |               | 3  | 5.85±1.01     | 40.38±4.95    | 3  |           |   |                  |       | Measurements at RT; cycle length 50 ms; holding potential -80 mV         |
|           | Beating bodies Patient hiPSC-CM | -42.93±3.86               | 7     | 5.86±0.28  | 36.73±0.32     | 7  | 8.7±0.57     | 70.15±2.76     |               |               | 7  | 2.89±0.35     | 34.45±14.45   | 6  |           |   |                  |       |                                                                          |
|           | Monolayer Control hiPSC-CM      | -45.62±5.37               | 11    | 3.94±0.14  | 32.96±0.79     | 11 | 6.7±0.33     | -48.8±0.79     |               |               | 8  | 2.58±0.31     | 46.17±7.01    | 5  |           |   |                  |       |                                                                          |
|           | Monolayer Patient hiPSC-CM      | -30.51±3.09               | 13    | 5.58±0.26  | 25.44±0.78     | 13 | 9.59±0.24    | 54.69±1.21     |               |               | 10 | 1.68±0.18     | 20.12±6.76    | 5  |           |   |                  |       |                                                                          |

|    |                                                       |                 |    |  |  |               |    |  |  |  |    |             |            |    |                                              |           |              |    |                                                                   |  |
|----|-------------------------------------------------------|-----------------|----|--|--|---------------|----|--|--|--|----|-------------|------------|----|----------------------------------------------|-----------|--------------|----|-------------------------------------------------------------------|--|
| 56 | WT (average from both controls)                       | -279±<br>53     | 20 |  |  | -58±<br>0.4   | 20 |  |  |  | 17 | 2.4±<br>0.2 | 62±<br>28  | 17 |                                              |           |              |    | Measurements at RT; cycle length 3s; holding potential -120 mV    |  |
|    | MUT1                                                  | -52±<br>10      | 31 |  |  | -31±<br>2     | 31 |  |  |  | 31 |             |            |    |                                              |           |              |    |                                                                   |  |
|    | MUT2                                                  | -96±<br>15      | 26 |  |  | -40±<br>3     | 26 |  |  |  | 25 |             |            |    |                                              |           |              |    |                                                                   |  |
|    | MUT (average from both mutants)                       | -68±<br>6       | 57 |  |  | -35±<br>0.5   | 57 |  |  |  | 57 | 2.7±<br>0.3 | 301±<br>46 | 57 |                                              |           |              |    |                                                                   |  |
| 88 | hiPSC-CM control                                      | -264.4±<br>57   | 13 |  |  |               |    |  |  |  |    |             |            |    | 0.5±<br>0.1                                  | 9         | 36±<br>3.3   | 13 | Measurements at RT; cycle length 5s; holding potential -90 mV     |  |
|    | hiPSC-CM het                                          | -121.4±<br>23.8 | 13 |  |  |               |    |  |  |  |    |             |            |    | 1.8±<br>0.2                                  | 9         | 31.7±<br>3.2 | 13 |                                                                   |  |
| 86 | Control                                               | -200±<br>10     | 22 |  |  |               |    |  |  |  |    |             |            |    | 1.8±<br>0.2                                  | 22        |              |    | Measurements at RT, at rate 0.33 Hz, holding potential of -100 mV |  |
|    | LQTS/BrS                                              | -180±<br>20     | 21 |  |  |               |    |  |  |  |    |             |            |    | 2.5±<br>0.25                                 | 21        |              |    |                                                                   |  |
|    | Control in second experiment with corrected iPSC-CMs  | -100±<br>25     | 6  |  |  |               |    |  |  |  |    |             |            |    | 0.3±<br>0.05                                 | 6         |              |    |                                                                   |  |
|    | LQTS/BrS in second experiment with corrected iPSC-CMs | -80±<br>10      | 13 |  |  |               |    |  |  |  |    |             |            |    | 0.8±<br>0.1                                  | 7         |              |    |                                                                   |  |
|    | corrected                                             | -65±<br>10      | 7  |  |  |               |    |  |  |  |    |             |            |    | 0.1±<br>0.1                                  | 13        |              |    |                                                                   |  |
| 69 | Control D1                                            | -116.9±<br>28.7 | 25 |  |  |               |    |  |  |  |    |             |            |    | -2.6±<br>0.3 /<br>inhibited -<br>1.1±<br>0.1 | 10/<br>10 |              |    | Measurements at RT; cycle length 4s; holding potential -100 mV    |  |
|    | Control D2                                            | -95.4 ±<br>41.6 | 12 |  |  |               |    |  |  |  |    |             |            |    | -2.8±<br>0.4 /<br>inhibited -<br>0.7±<br>0.2 | 15/<br>24 |              |    |                                                                   |  |
|    | Control D3                                            | -94.7 ±<br>28.3 | 11 |  |  |               |    |  |  |  |    |             |            |    | -3.2±<br>0.8 /<br>inhibited -<br>1±<br>0.2   | 10/<br>10 |              |    |                                                                   |  |
|    | BrS SCN10A                                            | -54.7±<br>9.4   | 37 |  |  |               |    |  |  |  |    |             |            |    | -1.1±<br>0.1 /<br>inhibited -<br>0.6±<br>0.1 | 17/<br>20 |              |    |                                                                   |  |
| 70 | Control D1                                            | -116.9±<br>28.7 | 25 |  |  | -53.2±<br>2.1 | 25 |  |  |  | 25 | 22±<br>8    |            | 25 | -0.4±<br>0.06                                | 12        |              |    | Measurements at RT; cycle length 4s;                              |  |

|    |                                     |                  |    |             |               |    |              |               |             |             |    |              |               |    |                |    |               |    |                                                                            |  |
|----|-------------------------------------|------------------|----|-------------|---------------|----|--------------|---------------|-------------|-------------|----|--------------|---------------|----|----------------|----|---------------|----|----------------------------------------------------------------------------|--|
|    | Control D2                          | -95.4±<br>41.6   | 12 |             | -43.3±<br>2.1 | 12 |              | -80.6±<br>1.5 |             |             | 12 | 20±<br>2     |               | 12 | -0.4±<br>0.08  | 16 |               |    | holding potential -<br>100 mV                                              |  |
|    | Control D3                          | -94.7±<br>28.3   | 11 |             | -45.1±<br>4.1 | 11 |              | -77.9±<br>2.6 |             |             | 11 | 22±<br>2     |               | 11 | -0.3±<br>0.006 | 14 |               |    |                                                                            |  |
|    | BrS                                 | -19.3±<br>3.7    | 22 |             | -37.8±<br>1.8 | 22 |              | -88.1±<br>1.8 |             |             | 22 | 75±<br>15    |               | 22 | -0.2±<br>0.03  | 14 |               |    |                                                                            |  |
| 71 | Ctl1                                | -58.8±<br>16.5   | 17 | 5.3±<br>0.2 | -39.4±<br>1.3 | 17 | 5.3±<br>0.1  | -83.4±<br>1.3 | 1.1±<br>0.1 | 2.9±<br>0.3 | 9  | 9.7±<br>0.6  | 109.1±<br>6.8 | 13 | 0±<br>1        | 7  | 45.7±<br>22.8 | 51 | Measurements at<br>RT; cycle length 50<br>ms; holding<br>potential -120 mV |  |
|    | BrS1                                | -36.8±<br>16.7   | 42 | 5.2±<br>0.2 | -36.1±<br>0.7 | 42 | 4.5±<br>0.6  | -82.9±<br>0.8 | 1.2±<br>0.1 | 3.5±<br>0.2 | 20 | 6.7±<br>0.4  | 93.6±<br>3.3  | 33 | -3±<br>5       | 40 | 55.5±<br>25.5 | 68 |                                                                            |  |
|    | Rad WT                              | -56.8±<br>35.0   | 18 | 7.4±<br>0.1 | -34.8±<br>0.6 | 9  | 6.9±<br>0.1  | -83.3±<br>1.2 |             |             | 9  |              |               |    |                |    |               |    |                                                                            |  |
|    | Rad R211H ins                       | -30.3±<br>14.2   | 14 | 8.4±<br>0.1 | -28.1±<br>0.4 | 10 | 5.7±<br>0.2  | -82.7±<br>1.5 |             |             | 10 |              |               |    |                |    |               |    |                                                                            |  |
| 92 | H9 hESC-CMs                         | -100±<br>60      | 7  |             |               |    |              |               |             |             |    |              |               |    |                |    |               |    | Measurements at<br>RT; 200 ms pulses;<br>holding potential -<br>120 mV     |  |
|    | AC patient iPSC-CMs                 | -20±<br>50       | 8  |             |               |    |              |               |             |             |    |              |               |    |                |    |               |    |                                                                            |  |
|    | AC patient iPSC-CMs<br>+ PKP2 WT    | -40±<br>20       | 8  |             |               |    |              |               |             |             |    |              |               |    |                |    |               |    |                                                                            |  |
|    | AC patient iPSC-CMs<br>+ PKP2-R635Q | -25±<br>15       | 10 |             |               |    |              |               |             |             |    |              |               |    |                |    |               |    |                                                                            |  |
| 87 | iPS-HS1M                            | -110±<br>18.7    | 15 |             |               |    |              |               |             |             |    |              |               |    |                |    |               |    | INa recordings at<br>RT; cycle length 3<br>s; holding potential<br>-90 mV  |  |
|    | iPS-HS1M +100 µM<br>ajmaline        | -15.4±<br>4.4    | 15 |             |               |    |              |               |             |             |    |              |               |    |                |    |               |    |                                                                            |  |
| 55 | iCtrl 1                             | -93.6±<br>84.9   | 36 | 6.9±<br>0.1 | -34.6±<br>0.5 | 26 | 6.48±<br>0.2 | -78.9±<br>1.4 |             |             | 15 | 1.5±<br>0.1  | 5.2±<br>0.5   | 36 |                |    |               |    | Measurements at<br>RT; cycle length 5s;<br>holding potential -<br>100 mV   |  |
|    | iCtrl 2                             | -83±<br>83.3     | 31 | 7±<br>0.2   | -33±<br>0.9   | 20 | 7.05±<br>0.3 | -85±<br>1     |             |             | 11 | 1.5±<br>0.1  | 5.9±<br>0.7   | 33 |                |    |               |    |                                                                            |  |
|    | iBrS 1                              | -81.7±<br>73.25  | 37 | 6.6±<br>0.1 | -33.5±<br>0.5 | 25 | 6.6±<br>0.2  | -83.6±<br>0.9 |             |             | 15 | 1.52±<br>0.1 | 6.4±<br>0.7   | 37 |                |    |               |    |                                                                            |  |
|    | iBrS 2                              | -96.8±<br>70.5   | 28 | 7±<br>0.2   | -34.7±<br>0.7 | 20 | 6.6±<br>0.2  | -84.5±<br>1   |             |             | 10 | 1.55±<br>0.1 | 7.2±<br>1     | 31 |                |    |               |    |                                                                            |  |
|    | iBrS 3                              | -151.7±<br>208.5 | 31 | 7.2±<br>0.2 | -32.1±<br>0.6 | 29 | 6.83±<br>0.2 | -80±<br>0.9   |             |             | 13 | 1.68±<br>0.2 | 7.3±<br>0.8   | 32 |                |    |               |    |                                                                            |  |
|    | iSCN5A                              | -38.7±<br>55.03  | 25 | 6.7±<br>0.2 | -31.8±<br>0.9 | 20 | 6.9±<br>0.2  | -83.7±<br>0.8 |             |             | 10 | 2.55±<br>0.2 | 16.5±<br>2    | 25 |                |    |               |    |                                                                            |  |

Supplementary Table 4: Calcium current ( $I_{CaL}$ ) properties from published BrS iPSC-CMs.  $V_{1/2}$  – mid-point of activation/inactivation;  $\kappa$  – slope factor of activation/inactivation curve;  $\tau_f$  – fast kinetics;  $\tau_s$  – slow kinetics; RT – room temperature.

| Reference | Cell line                       | $I_{CaL}$ properties |    |                |          |    |               |               |                | Protocol |                                        |
|-----------|---------------------------------|----------------------|----|----------------|----------|----|---------------|---------------|----------------|----------|----------------------------------------|
|           |                                 | Peak                 |    | Activation     |          |    | Inactivation  |               |                |          |                                        |
|           |                                 | pA/pF                | n  | $V_{1/2}$ [mV] | $\kappa$ | n  | $\tau_f$ [ms] | $\tau_s$ [ms] | $V_{1/2}$ [mV] |          | n                                      |
| 56        | WT (average from both controls) | -5.8±0.5             | 19 |                |          |    |               |               |                |          | Not specified                          |
|           | MUT (average from both mutants) | -8±1                 | 57 |                |          |    |               |               |                |          |                                        |
| 69        | Control D1                      | -9.9 ±1.7            | 18 | -7 ±1.8        |          |    |               |               | -36 ±2.1       | 18       | measurements at RT                     |
|           | Control D2                      | -10.1 ±2.8           | 11 | -6.6 ±1.3      |          |    |               |               | -36.2 ±2.2     | 11       |                                        |
|           | Control D3                      | -6.5 ±1.3            | 11 | -5.5 ±1.5      |          |    |               |               | -34.6 ±1.3     | 11       |                                        |
|           | BrS SCN10A                      | -3.4 ±1.5            | 12 | 12.3 ±4.1      |          |    |               |               | -47.1 ±3.2     | 12       |                                        |
| 70        | D1                              | -8.0±1.4             | 20 | -7±2           |          | 20 |               | 15±5          | -35±2          | 20       | Not specified                          |
|           | D2                              | -8.4±1.9             | 18 | -6.5±1.5       |          | 18 |               | 13±6          | -35±3          | 18       |                                        |
|           | D3                              | -6.5±1.3             | 11 | -5,9±1,1       |          | 11 |               | 11±5          | -33±2          | 11       |                                        |
|           | BrS                             | -7.4±2.4             | 13 | -5±5.2         |          | 12 |               | 33±8          | -33±9          | 13       |                                        |
| 71        | Ctl1                            | -26.3±7.1            | 34 | -18.6±0.6      | 5.5±0.1  | 34 |               |               |                |          | Not specified                          |
|           | BrS1                            | -18.9±6.0            | 24 | -18.6±0.6      | 5.8±0.1  | 24 |               |               |                |          |                                        |
|           | Rad WT                          | -6.1±1.7             | 6  | -14.1±0.6      | 6.7±0.4  | 6  |               |               |                |          |                                        |
|           | Rad R211H ins                   | -1.7±0.5             | 8  | -11.2±0.6      | 6.2±0.3  | 8  |               |               |                |          |                                        |
| 55        | iCtrl 1                         | -52±3                | 21 |                |          |    | 4.0±0.2       | 18.2±0.8      |                |          | measurements at 36°C; cycle lengths 2s |
|           | iCtrl 2                         | -58±3                | 21 |                |          |    | 3.7±0.2       | 21.5±1.3      |                |          |                                        |
|           | iBrS 2                          | -60±3                | 19 |                |          |    | 3.6±0.3       | 21.5±1.4      |                |          |                                        |

Supplementary Table 5: Calcium transient properties from published BrS iPSC-CMs. CTD50/75 – calcium transient duration at 50/75% of depolarization.

| Reference | Cell line     | CT properties |             |                    |                |                |       | Protocol                                                                               |
|-----------|---------------|---------------|-------------|--------------------|----------------|----------------|-------|----------------------------------------------------------------------------------------|
|           |               | CTD50 [ms]    | CTD 75 [ms] | Beat interval [ms] | Rise rate [ms] | Amplitude [mV] | n     |                                                                                        |
| 68        | CON1          | 471.3±12.6    |             | 108.3±20.4         | 92.0±6.6       | 6±0.3          | 10-25 | CT measured on dissociated cells with 5 µM Fluo-4 AM and 0.02% Pluronic F-127 at 37°C. |
|           | CON2          |               |             |                    |                |                |       |                                                                                        |
|           | BrS1          | 1362.7±124.6  |             | 1894.7±436.5       | 10.3±0.9       | 2.6±0.2        | 10-25 |                                                                                        |
|           | BrS2          | 541.5±60.2    |             | 313.3±59.1         | 45.2±4.7       | 2.3±0.2        | 10-25 |                                                                                        |
|           | BrSp2-GE      | 589.3±27.4    |             | 190.7±24.6         | 72.7±5.0       | 4.7±0.1        | 10-25 |                                                                                        |
| 71        | Ctl1          |               | 500±150     |                    |                |                | 5     | CT measured on single CMs at 37°C.                                                     |
|           | BrS1          |               | 790±180     |                    |                |                | 7     |                                                                                        |
|           | Rad WT        |               | 390±400     |                    |                |                | 22    |                                                                                        |
|           | Rad R211H ins |               | 590±400     |                    |                |                | 27    |                                                                                        |

Supplementary Table 6: Field potential properties from published BrS iPSC-CMs. FPD – field potential duration; BPM – beats per minute.

| Reference | Cell line                 | FPD           |                      |                    |                     |                      |                    | Protocol                                                                                                                                                                                    |
|-----------|---------------------------|---------------|----------------------|--------------------|---------------------|----------------------|--------------------|---------------------------------------------------------------------------------------------------------------------------------------------------------------------------------------------|
|           |                           | Baseline [ms] | 100 nM ajmaline [ms] | 1 µM ajmaline [ms] | 10 µM ajmaline [ms] | 100 µM ajmaline [ms] | Beating rate [BPM] |                                                                                                                                                                                             |
| 86        | Control                   | 210±5         |                      |                    |                     |                      | 65±17              | Not specified                                                                                                                                                                               |
|           | LQTS/BrS                  | 350±50        |                      |                    |                     |                      | 59±6               |                                                                                                                                                                                             |
| 87        | iPS-HS1M                  | 322.3±19.1    | 326.0±19.3           | 334.4±19.0         | 379.8±29.4          | 462.1±47.4           |                    | Sampling frequency 10 kHz at 37°C. One minute baseline recordings were taken after minimum 15 min superfusion of basal media, and 1 min drug recordings were taken after 6 min superfusion. |
|           | iBR1-P5M-L1               | 319.6±12.8    | 327.4±13.6           | 352.1±12.6         | 385.7±13.3          | 415.2±26.1           |                    |                                                                                                                                                                                             |
|           | iBR1-P5M-L9               | 281.3±15.0    | 307.7±13.8           | 328.7±15.0         | 364.8±16.4          | 418.7±23.1           |                    |                                                                                                                                                                                             |
|           | iBR1-P3M-N2 (PKP2-R101H ) | 395.5±10.9    | 439.3±7.9            | 448.0±13.9         | 505.0±21.8          | 596.6±19.5           |                    |                                                                                                                                                                                             |
|           | iBR1-P6M-L1               | 385.4±32.9    | 410.1±32.8           | 428.7±29.7         | 484.0±30.1          | 553.0±27.0           |                    |                                                                                                                                                                                             |

Supplementary Table 7:  $I_{to}$  properties from published BrS iPSC-CMs.  $V_{1/2}$ - mid-point of inactivation

| Reference | Cell line                       | $I_{to}$ properties |    |                    |           |    | Protocol                                |
|-----------|---------------------------------|---------------------|----|--------------------|-----------|----|-----------------------------------------|
|           |                                 | Peak                |    | Inactivation       |           |    |                                         |
|           |                                 | pA/pF               | n  | Time constant [ms] | $V_{1/2}$ | n  |                                         |
| 56        | WT (average from both controls) | 15±1                | 18 |                    |           |    | Not specified                           |
|           | MUT (average from both mutants) | 6±1                 | 59 |                    |           |    |                                         |
| 70        | Control D1                      | 2.7±0.4             |    |                    |           |    | Not specified                           |
|           | Control D2                      | 1.9±0.6             |    |                    |           |    |                                         |
|           | BrS                             | 1.7±0.4             |    |                    |           |    |                                         |
| 55        | iCtrl 1                         | 14.5±2              | 13 | 28.1±4.6           |           | 13 | Measurements at 36 °C; cycle length 10s |
|           | iCtrl 2                         | 11.5±2              | 13 | 26±5               |           | 13 |                                         |
|           | iBrS 2                          | 14.5±2.5            | 13 | 27.1±3.3           |           | 13 |                                         |

Supplementary Table 8:  $I_{Kr}$  properties from published BrS iPSC-CMs.

| Reference | Cell line  | Peak $I_{Kr}$ |    |                             |   | Protocol      |
|-----------|------------|---------------|----|-----------------------------|---|---------------|
|           |            | pA/pF         | n  | pA/pF +100 $\mu$ M ajmaline | n |               |
| 70        | Control D1 | 2.5±0.25      | 19 |                             |   | Not specified |
|           | Control D2 | 2.2±0.4       | 11 |                             |   |               |
|           | BrS        | 1.1±0.2       | 13 |                             |   |               |
| 87        | iPS-HS1M   | 1.7±0.2       | 8  | 0.7±0.1                     | 8 | Not specified |

Supplementary Table 9:  $I_{Ks}$  properties from published BrS iPSC-CMs.

| Reference | Cell line  | Peak $I_{Ks}$ |    | Protocol      |
|-----------|------------|---------------|----|---------------|
|           |            | pA/pF         | n  |               |
| 64        | Control D1 | 1.2±0.2       | 21 | Not specified |
|           | Control D2 | 1.25±0.25     | 14 |               |
|           | BrS SCN10A | 0.3±0.2       | 7  |               |
| 65        | Control D1 | 0.7±0.2       | 16 | Not specified |
|           | Control D2 | 0.7±0.3       | 13 |               |
|           | Control D3 | N/A           |    |               |
|           | BrS        | 0.1±0.09      | 10 |               |
